# Supplementary material for: In-Silico Virtual Screening of Novel Antitoxic Agents from Talinum paniculatum as Inhibitors of Phospholipase A2 and Metalloproteinase Receptor for Antivenom Study
Source: Research Square preprint supplement (doi:10.21203/rs.3.rs-6098491/v1), 2025-04-21
Supplement: Supplementary file 2 [file 5301d6178970dab9774fd9dd.docx]

**Table 1. Quantum Chemical Calculations of Lead Compound and the Standard Compound.**

| Compounds | Homo |  | Lumo | Eg | I | A | χ | η | δ | ω |
| --- | --- | --- | --- | --- | --- | --- | --- | --- | --- | --- |
| Rutin | -0.19703 |  | -0.04211 | 0.15492 | 0.19703 | 0.04211 | 0.11957 | 0.07746 | 12.9098 | 0.09228 |
| Kaempferol | -0.19464 |  | -0.05494 | 0.1397 | 0.19464 | 0.05494 | 0.12479 | 0.06985 | 14.3163 | 0.11147 |
| Quercetin | -0.19392 |  | -0.05648 | 0.13744 | 0.19392 | 0.05648 | 0.1252 | 0.06872 | 14.5518 | 0.11405 |
| Talinumoside I | -0.06609 |  | 0.05151 | 0.1176 | 0.06609 | -0.05151 | 0.00729 | 0.0588 | 17.0068 | 0.00045 |
| Varespladib | -0.07068 |  | 0.05526 | 0.12594 | 0.07068 | -0.05526 | 0.00771 | 0.06297 | 15.8805 | 0.00047 |
| Varespladib Methyl | -0.19388 |  | -0.04717 | 0.14671 | 0.19388 | 0.04717 | 0.12052 | 0.07335 | 13.6323 | 0.09901 |
| Darapladib | -0.21105 |  | -0.06087 | 0.15018 | 0.21105 | 0.06087 | 0.13596 | 0.07509 | 13.3173 | 0.12308 |
| Marimastat | -0.24522 |  | -0.00427 | 0.24095 | 0.24522 | 0.00427 | 0.12475 | 0.12048 | 8.30048 | 0.06458 |
| Ilomastat | -0.19938 |  | -0.01338 | 0.186 | 0.19938 | 0.01338 | 0.10638 | 0.093 | 10.75269 | 0.06084 |

**Table 2. Illustration of the Molecular Orbitals of Lead Compounds and the Standard Compounds.**

| COMPOUNDS | HOMO | LUMO |
| --- | --- | --- |
| Rutin | 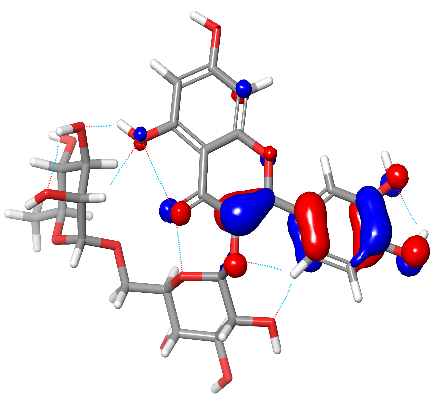 | 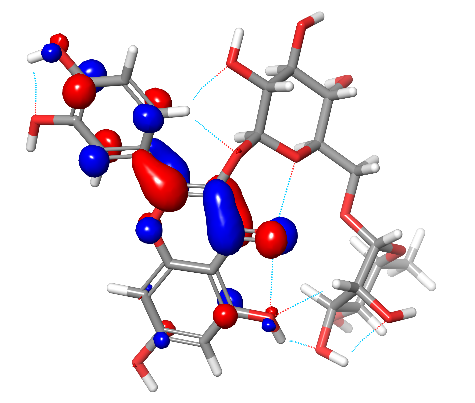 |
| Kaempferol | 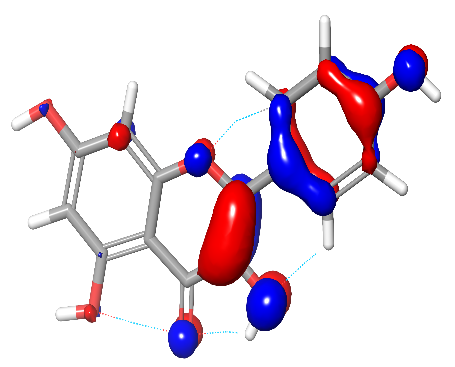 | 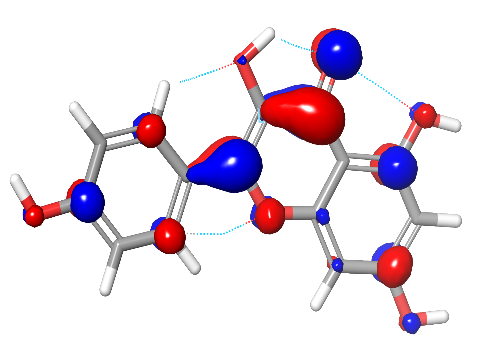 |
| Quercetin | 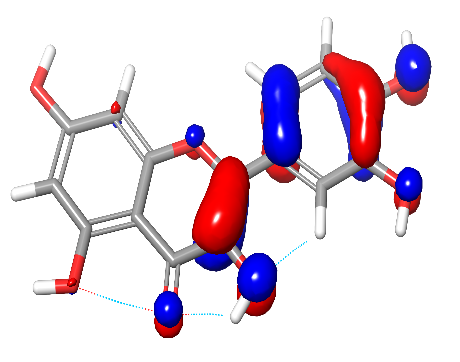 | 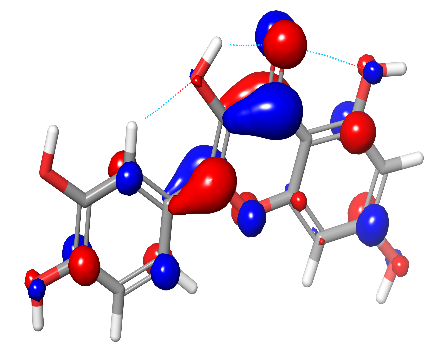 |
| Talinumoside I | 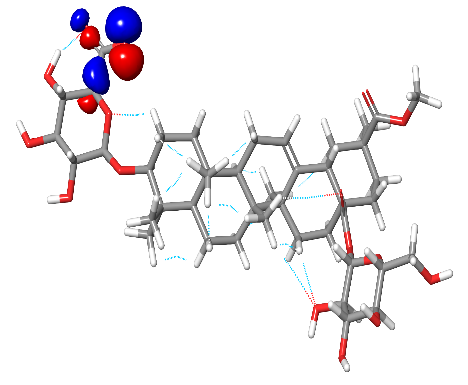 | 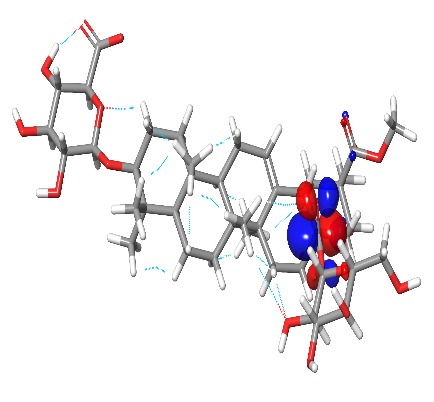 |
| Varespladib | 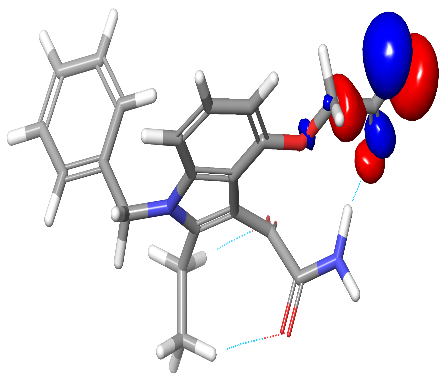 | 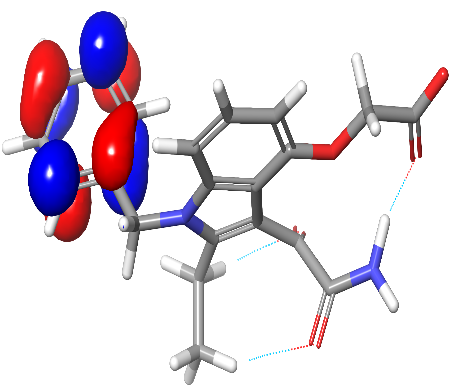 |
| Varespladib Methyl | 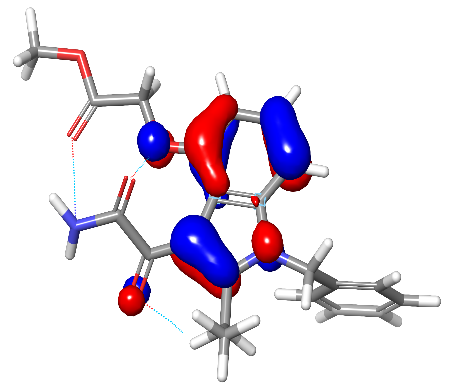 | 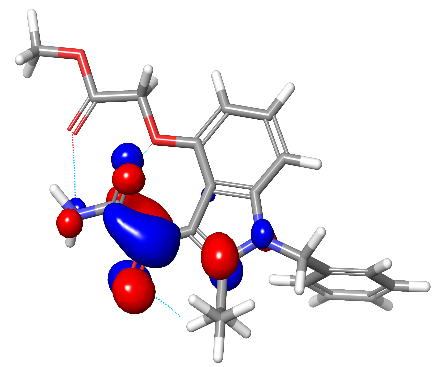 |
| Darapladib | 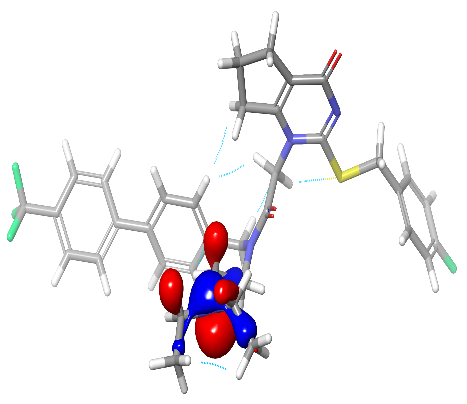 | 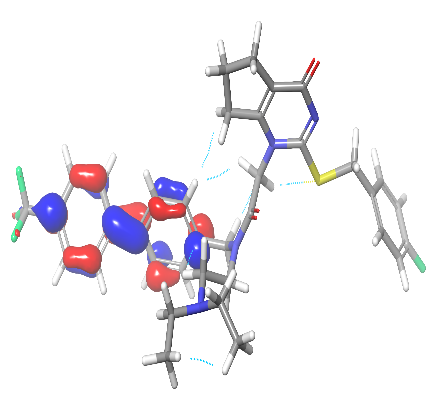 |
| Marimastat | 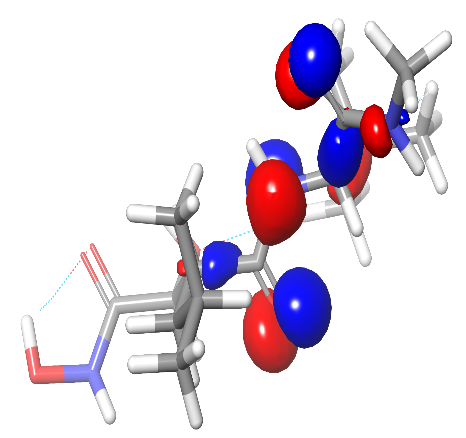 | 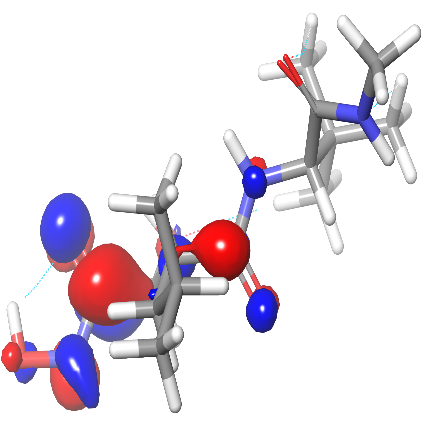 |
| Ilomastat | 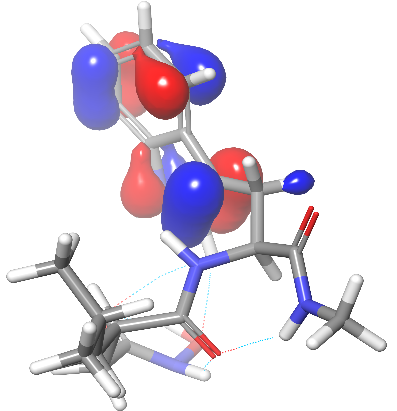 | 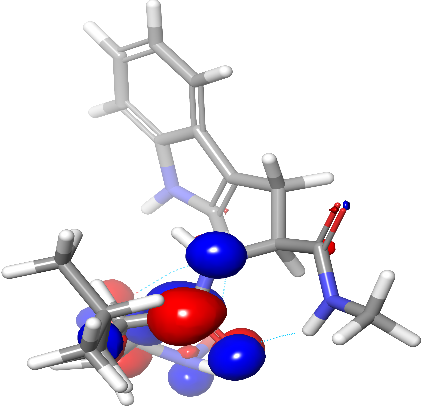 |

**Table 3: Physicochemical Properties of Top-Scoring Compounds**

| Compounds | Molecular weight(g/mol) | TPSA (Å2) | Log P | Log S | nHA | nHD |
| --- | --- | --- | --- | --- | --- | --- |
| Rutin | 610.52 | 269.43 | -1.29 | -3.30 | 16 | 10 |
| Kaempferol | 286.24 | 111.13 | 1.58 | -3.31 | 6 | 4 |
| Quercetin | 302.24 | 131.36 | 1.23 | -3.16 | 7 | 5 |
| Talinumoside I | 838.97 | 259.20 | 1.80 | -6.34 | 16 | 8 |
| Varespladib | 380.39 | 111.62 | 2.18 | -3.80 | 5 | 2 |
| Varespladib Methyl | 394.42 | 100.62 | 2.56 | -4.01 | 5 | 1 |
| Darapladib | 666.77 | 83.74 | 6.89 | -7.75 | 8 | 0 |
| Marimastat | 331.41 | 127.76 | 1.23 | -1.49 | 5 | 5 |
| Ilomastat | 388.46 | 123.32 | 1.80 | -2.26 | 4 | 5 |

Table 4: Descriptors of Absorption and Distribution

| Compounds | GI absorption | | P-gp substrate | | | BBB penetration | |
| --- | --- | --- | --- | --- | --- | --- | --- |
| Rutin | | Low | | Yes |  | | No | |
| Kaempferol | | High | | No |  | | No | |
| Quercetin | | High | | No |  | | No | |
| Talinumoside I | | Low | | Yes |  | | No | |
| Varespladib | | High | | No |  | | No | |
| Varespladib Methyl | | High | | No |  | | No | |
| Darapladib | | Low | | Yes |  | | No | |
| Marimastat | | High | | No |  | | No | |
| Ilomastat | | High | | Yes |  | | No | |

**Table 5: Descriptors for Pharmacokinetics**

| Compounds | CYP1A2 inhibitor | | CYP2C19 inhibitor | | CYP2C9 inhibitor | | CYP2D6 inhibitor | | CYP3A4 inhibitor | |
| --- | --- | --- | --- | --- | --- | --- | --- | --- | --- | --- |
| Rutin | | No | | No | | No | | No | | No |
| Kaempferol | | Yes | | No | | No | | Yes | | Yes |
| Quercetin | | Yes | | No | | No | | Yes | | Yes |
| Talinumoside I | | No | | No | | No | | No | | No |
| Varespladib | | No | | No | | Yes | | No | | No |
| Varespladib Methyl | | No | | Yes | | Yes | | No | | Yes |
| Darapladib | | Yes | | No | | No | | Yes | | Yes |
| Marimastat | | No | | No | | No | | No | | No |
| Ilomastat | | No | | No | | No | | No | | No |

**Table 6: Excretion and Toxicity Parameters**

| Compounds | LD50 (mg/kg) | |  | Hepatotoxicity | | Carcinogenicity | | cytotoxicity | |
| --- | --- | --- | --- | --- | --- | --- | --- | --- | --- |
| Rutin | | 5000 | | | No | | No | | No |
| Kaempferol | | 3919 | | | No | | No | | No |
| Quercetin | | 159 | | | No | | Yes | | No |
| Talinumoside I | | 3220 | | | No | | No | | No |
| Varespladib | | 78 | | | No | | No | | Yes |
| Varespladib Methyl | | 78 | | | No | | Yes | | Yes |
| Darapladib | | 800 | | | No | | No | | No |
| Marimastat | | 2000 | | | No | | No | | No |
| Ilomastat | | 300 | | | Yes | | Yes | | No |

**Table 7: Druglikeness and Bioavailability Score**

| Compounds | Lipinski rule  Violations | | Egan rule  Violations | | Veber rule Bioavailability score Violations | | |
| --- | --- | --- | --- | --- | --- | --- | --- |
| Rutin | | 3 | | 1 | | 1 | 0.17 |
| Kaempferol | | 0 | | 0 | | 0 | 0.55 |
| Quercetin | | 0 | | 0 | | 0 | 0.55 |
| Talinumoside I | | 3 | | 1 | | 1 | 0.11 |
| Varespladib | | 0 | | 0 | | 0 | 0.56 |
| Varespladib Methyl | | 0 | | 0 | | 0 | 0.55 |
| Darapladib | | 2 | | 1 | | 1 | 0.17 |
| Marimastat | | 0 | | 0 | | 1 | 0.55 |
| Ilomastat | | 0 | | 0 | | 1 | 0.55 |
