# Supplementary figures and images for: In-Silico Virtual Screening of Novel Antitoxic Agents from Talinum paniculatum as Inhibitors of Phospholipase A2 and Metalloproteinase Receptor for Antivenom Study
Source: Research Square preprint supplement (doi:10.21203/rs.3.rs-6098491/v1), 2025-04-21

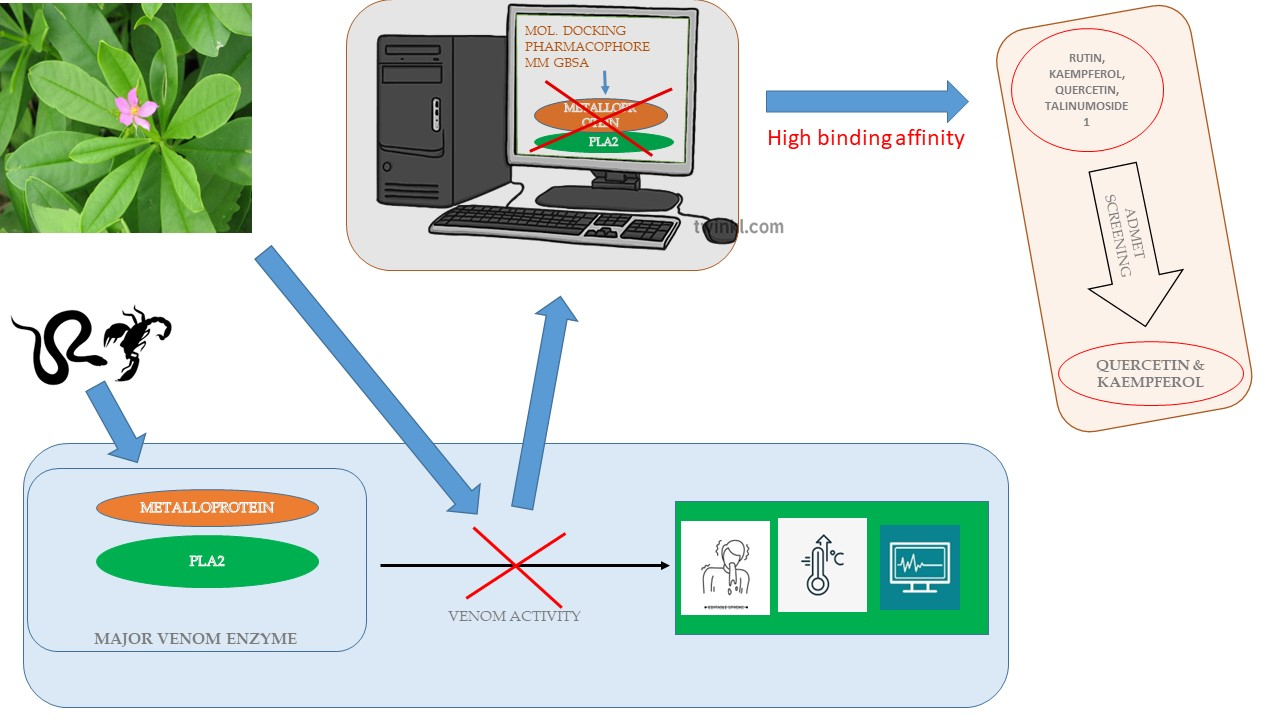

Supplement: Supplementary file 1 [file 09601a5cbb3e016d86383136.docx]
